# Supplementary material
Source: publisher figshare collection journal article supplement (https://gsajournals.figshare.com/ndownloader/files/15368747)
Supplement: Supplementary file 1 [file 15368747]

## Sheet: Sheet1
Table S3: List of genes that differentially upregulated in both STAT and Myc supercompetitors (p<0.05)
Flybase ID	Gene	Fold Change (hop vs GFP)	Adjusted p-value (hop vs GFP)	Fold Change (Myc vs GFP)	Adjusted p-value (Myc vs GFP)
FBgn0013279	Hsp70Bc	3.31719	9.69832e-06	2.9178	0.000122692
FBgn0039972	CG17018	2.84747	1.27396e-05	1.99803	0.0107954
FBgn0040251	Ugt86Di	2.31017	1.23183e-06	1.68864	0.00874303
FBgn0283427	FASN1	2.22715	1.0398e-08	1.56012	0.00718887
FBgn0032405	CG14946	2.19608	0.000167271	2.4171	1.27394e-05
FBgn0052865	alphagamma-element:CR32865	2.10538	0.00317438	2.05765	0.00484479
FBgn0034579	mRpL54	1.94561	0.00802568	2.75675	6.16516e-06
FBgn0004652	fru	1.92311	0.00117654	1.66253	0.0206867
FBgn0250910	Octbeta3R	1.91547	0.0086965	2.78252	4.03337e-06
FBgn0083123	Uhg5	1.91493	0.000525081	1.53921	0.048763
FBgn0052207	CR32207	1.88343	0.0131415	2.48739	7.5884e-05
FBgn0038326	CG5044	1.83274	0.00927117	1.84473	0.00938664
FBgn0016694	Pdp1	1.76763	0.00327974	3.00359	4.0996e-11
FBgn0024920	Ts	1.70912	0.0254562	1.85561	0.00833574
FBgn0027580	PCB	1.6582	0.000766649	1.83128	2.54245e-05
FBgn0286051	CG8368	1.634	0.0178636	1.58987	0.0337519
FBgn0263490	mld	1.61708	0.000408955	1.52371	0.00271698
FBgn0002778	mnd	1.59211	0.0102999	1.81719	0.000432433
FBgn0260795	NaPi-III	1.57398	0.00441865	2.0074	1.32147e-06
FBgn0034914	CG5554	1.56123	0.0160442	1.64938	0.00552593
FBgn0039828	CG1542	1.52632	0.0100537	1.85849	2.84826e-05
FBgn0010222	Nmdmc	1.51943	0.0197872	2.01401	8.41474e-06
FBgn0086687	Desat1	1.51625	0.0201275	1.59687	0.00787984
FBgn0026409	Mpcp2	1.50403	0.00172411	2.02719	1.03644e-09
